# Supplementary material for: Interpretable machine learning framework for predicting the reactivity of trifluoromethylating reagents
Source: Royal Society of Chemistry journal article supplement (doi:10.1039/d5cp03702f), 2025-12-16
Supplement: d5cp03702f1.pdf [file d5cp03702f1.pdf]

## **Interpretable machine learning framework for predicting the reactivity of trifluoromethylating reagents**

Vaneet Saini<sup>\*1</sup>, Shivansh Kanwar

*Department of Chemistry & Centre for Advanced Studies in Chemistry, Panjab University, Chandigarh 160014,*

*India.* Email: [vsaini@pu.ac.in](mailto:vsaini@pu.ac.in)

Orcid ID: [0000-0002-8186-5166](https://orcid.org/0000-0002-8186-5166)

Table S1. Number of molecules in the train and test set from each type.

| Set              | Type of reagent    | Train molecules | Test molecules | Total     |
|------------------|--------------------|-----------------|----------------|-----------|
| Type of reagents | Chalcogenium salts | 48              | 13             | 61        |
|                  | Sulfoximines       | 9               | 3              | 12        |
|                  | HIR                | 20              | 6              | 26        |
|                  |                    |                 |                | <b>99</b> |

Table S2. Molecules with highest and lowest TC+DA values.

| S. No | Type              | Structure                                                                          | TC+DA |
|-------|-------------------|------------------------------------------------------------------------------------|-------|
| 1.    | Chalcogenium salt | 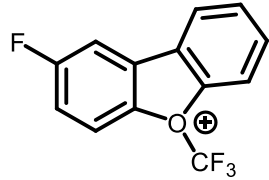  | 26.7  |
| 2.    | Sulfoximines      |  | 89.4  |

Table S3. . Hyperparameters for NN and ET models, along with the performance metrics obtained from training with 5 descriptors.

| S. No. | Model | Hyperparameters                                                                                                                                                                                                                                                                            | Cross-val R <sup>2</sup> | Train R <sup>2</sup> | Test R <sup>2</sup> | Test RMSE |
|--------|-------|--------------------------------------------------------------------------------------------------------------------------------------------------------------------------------------------------------------------------------------------------------------------------------------------|--------------------------|----------------------|---------------------|-----------|
| 1.     | NN    | {<br>Input_layer = 64,<br>dropout_layer = 0.1,<br>hidden_layer1 = 128,<br>dropout_layer1 = 0.1,<br>hidden_layer2 = 128,<br>dropout_layer2 = 0.1,<br>optimizer = "Adam",<br>loss_function = "mse",<br>epochs = 200,<br>batch_size = 32,<br>lr = 0.001,<br>activation function = "ReLU"<br>} | 0.847                    | 0.962                | 0.943               | 3.84      |
| 2.     | NN*   | {<br>Input_layer = 96,<br>dropout_layer = 0.2,<br>hidden_layer1 = 256,<br>dropout_layer1 = 0.5,<br>hidden_layer2 = 128,<br>dropout_layer2 = 0.1,<br>optimizer = "Adam",<br>loss_function = "mse",<br>epochs = 100,<br>batch_size = 32,<br>lr = 0.01,<br>activation function = "ReLU"<br>}  | 0.900                    | 0.945                | 0.956               | 3.43      |
| 3.     | ET    | {bootstrap=False,<br>max_depth=None,<br>max_features=1.0,                                                                                                                                                                                                                                  | 0.867                    | 1.0                  | 0.943               | 3.75      |

|  |  |                                                                                        |  |  |  |  |
|--|--|----------------------------------------------------------------------------------------|--|--|--|--|
|  |  | min_samples_leaf=1,<br>min_samples_split=2,<br>n_estimators=100,<br>random_state = 42} |  |  |  |  |
|--|--|----------------------------------------------------------------------------------------|--|--|--|--|

\*represents tuned parameters.

Table S4 Actual and predicted TC<sup>+</sup>DA values for the NN model trained on the 5 descriptors.

| ID   | TOR                 | Smiles                                                                                               | Set   | TC+DA values |           |
|------|---------------------|------------------------------------------------------------------------------------------------------|-------|--------------|-----------|
|      |                     |                                                                                                      |       | Actual       | Predicted |
| Ea1b | Chalc<br>·<br>Salts | <chem>FC([S+])C2=CC=C(OC)C=C2C3=C1C=CC=C3)(F)F</chem>                                                | Train | 45.5         | 44.1      |
| Ea1c | Chalc<br>·<br>Salts | <chem>FC([S+])C2=CC=C(C)C=C2C3=C1C=CC=C3)(F)F</chem>                                                 | Train | 44.1         | 45.2      |
| Ea1d | Chalc<br>·<br>Salts | <chem>FC1=CC=C([S+])(C(F)(F)F)C2=C3C=CC=C2)C3=C1</chem>                                              | Train | 42.1         | 43.3      |
| Ea1e | Chalc<br>·<br>Salts | <chem>C1C1=CC=C([S+])(C(F)(F)F)C2=C3C=CC=C2)C3=C1</chem>                                             | Train | 41           | 45.6      |
| Ea1g | Chalc<br>·<br>Salts | <chem>FC([S+])C2=CC=C(C(F)(F)F)C=C2C3=C1C=CC=C3)(F)F</chem>                                          | Train | 39.2         | 44.2      |
| Ea1h | Chalc<br>·<br>Salts | <chem>FC([S+])C2=CC=C(C#N)C=C2C3=C1C=CC=C3)(F)F</chem>                                               | Train | 37.9         | 44.1      |
| Ea1i | Chalc<br>·<br>Salts | <chem>FC([S+])C2=CC=C([N+])([O-])=O)C=C2C3=C1C=CC=C3)(F)F</chem>                                     | Train | 36.7         | 37.8      |
| Ea1j | Chalc<br>·<br>Salts | <chem>[H]C1=C(C)C=C2C([S+])(C(F)(F)F)C3=C2C=C(C)C([H])=C3[H])=C1[H]</chem>                           | Train | 45.2         | 47.4      |
| Ea1k | Chalc<br>·<br>Salts | <chem>[H]C1=C(C)C=C2C([S+])(C(F)(F)F)C3=C2C=C([H])C([H])=C3C)=C1[H]</chem>                           | Train | 44.5         | 45.4      |
| Ea1l | Chalc<br>·<br>Salts | <chem>[H]C1=C(C)C=C2C([S+])(C(F)(F)F)C3=C2C=C([H])C([H])=C3[H])=C1C</chem>                           | Train | 44.9         | 45.4      |
| Ea1o | Chalc<br>·<br>Salts | <chem>[H]C1=C([H])C([H])=C([S+])(C(F)(F)F)C2=C3C=C([H])C([N+])([O-])=O)=C2[H])C3=C1</chem>           | Train | 37.5         | 37.8      |
| Ea1p | Chalc<br>·<br>Salts | <chem>[H]C1=C([N+])([O-])=O)C([H])=C([S+])(C(F)(F)F)C2=C3C=C([H])C([N+])([O-])=O)=C2[H])C3=C1</chem> | Train | 32.3         | 30.8      |
| Ea1r | Chalc<br>·<br>Salts | <chem>[H]C1=C(C)C=C2C([S+])(C(F)(F)F)C3=C2C=C([H])C([N+])([O-])=O)=C3[H])=C1C</chem>                 | Train | 39.3         | 38.1      |
| Ea2a | Chalc<br>·<br>Salts | <chem>[H]C1=CC=C([O+])(C(F)(F)F)C2=C3C=CC=C2)C3=C1</chem>                                            | Train | 27.8         | 27.8      |
| Ea2b | Chalc<br>·<br>Salts | <chem>FC([O+])C2=CC=C(C(C)(C)C)C=C2C3=C1C=CC=C3)(F)F</chem>                                          | Train | 29.1         | 27.7      |
| Ea2c | Chalc<br>·<br>Salts | <chem>FC1=CC=C([O+])(C(F)(F)F)C2=C3C=CC=C2)C3=C1</chem>                                              | Train | 26.7         | 28.8      |
| Ea3a | Chalc<br>·<br>Salts | <chem>[H]C1=CC=C2C([Se+])(C(F)(F)F)C3=C2C=CC=C3)=C1</chem>                                           | Train | 51.6         | 43.8      |
| Ea3b | Chalc<br>·<br>Salts | <chem>FC([Se+])C2=CC([N+])([O-])=O)=CC=C2C3=C1C=CC=C3)(F)F</chem>                                    | Train | 43.3         | 44.2      |
| Ea4a | Chalc<br>·<br>Salts | <chem>[H]C1=CC=C2C([Te+])(C(F)(F)F)C3=C2C=CC([H])=C3)=C1</chem>                                      | Train | 59.7         | 53.3      |
| Ea4b | Chalc<br>·<br>Salts | <chem>FC([Te+])C2=CC([N+])([O-])=O)=CC=C2C3=C1C=C([N+])([O-])=O)C=C3)(F)F</chem>                     | Train | 52.2         | 53.5      |
| Ea5a | Chalc<br>·<br>Salts | <chem>[H]C(C=C1)=CC=C1[S+](C(F)(F)F)C2=CC=CC=C2</chem>                                               | Train | 50.4         | 48.6      |

|      |                |                                                                    |       |      |      |
|------|----------------|--------------------------------------------------------------------|-------|------|------|
| Ea5b | Chalc<br>Salts | FC([S+](C1=CC=CC=C1)C2=CC=C(OC)C=C2)(F)F                           | Train | 52.2 | 49.3 |
| Ea5c | Chalc<br>Salts | FC([S+](C1=CC=CC=C1)C2=CC=C(C)C=C2)(F)F                            | Train | 51.1 | 51.7 |
| Ea5d | Chalc<br>Salts | FC(C=C1)=CC=C1[S+](C(F)(F)F)C2=CC=CC=C2                            | Train | 49.5 | 47.4 |
| Ea5e | Chalc<br>Salts | ClC(C=C1)=CC=C1[S+](C(F)(F)F)C2=CC=CC=C2                           | Train | 48.5 | 45.5 |
| Ea5f | Chalc<br>Salts | BrC(C=C1)=CC=C1[S+](C(F)(F)F)C2=CC=CC=C2                           | Train | 48.3 | 44.1 |
| Ea5h | Chalc<br>Salts | FC([S+](C1=CC=CC=C1)C2=CC=C(C#N)C=C2)(F)F                          | Train | 45.4 | 46.5 |
| Ea5k | Chalc<br>Salts | FC([S+](C1=CC=C(C)C=C1)C2=CC=C(C)C=C2)(F)F                         | Train | 52.7 | 53.1 |
| Ea5l | Chalc<br>Salts | FC(C=C1)=CC=C1[S+](C(F)(F)F)C2=CC=C(F)C=C2                         | Train | 49.3 | 46.9 |
| Ea5m | Chalc<br>Salts | FC1=CC(F)=CC=C1[S+](C(F)(F)F)C2=CC=CC=C2                           | Train | 45.7 | 46.4 |
| Ea5n | Chalc<br>Salts | ClC(C=C1)=CC=C1[S+](C(F)(F)F)C2=CC=C(Cl)C=C2                       | Train | 46.8 | 44.0 |
| Ea5o | Chalc<br>Salts | FC([S+](C1=CC=C(OC2=CC=CC=C2)C=C1)C3=CC=C(OC4=CC=CC=C4)C=C3)(F)F   | Train | 52.9 | 49.0 |
| Ea5q | Chalc<br>Salts | FC([S+](C1=CC=CC=C1)C2=CC(C(F)(F)F)=CC(C(F)(F)F)=C2)(F)F           | Train | 43.6 | 45.4 |
| Ea5r | Chalc<br>Salts | FC([S+](C1=CC=C([N+])([O-])=O)C=C1)C2=CC=C([N+])([O-])=O)C=C2)(F)F | Train | 39.3 | 30.6 |
| Ea5s | Chalc<br>Salts | FC(C=C1)=CC=C1[S+](C(F)(F)F)C2=CC=CC([N+])([O-])=O)C=C2            | Train | 44.4 | 41.2 |
| Ea5t | Chalc<br>Salts | ClC(C=C1)=CC=C1[S+](C(F)(F)F)C2=CC=C(OC)C=C2                       | Train | 50.5 | 46.9 |
| Ea5u | Chalc<br>Salts | ClC(C=C1)=CC=C1[S+](C(F)(F)F)C2=CC=C(C)C=C2C                       | Train | 49.1 | 49.6 |
| Ea6b | Chalc<br>Salts | C[C@]12C(C3=CC4=CC=CC=C4[S+]3C(F)(F)F)=C[C@@H](C2(C)C)CC1          | Train | 41.9 | 43.2 |
| Ea6c | Chalc<br>Salts | FC([S+]1C2=CC=CC=C2C=C1C3=CC=CC=C3)(F)F                            | Train | 39.5 | 45.3 |
| Ea6e | Chalc<br>Salts | FC([S+]1C2=CC=CC=C2C=C1C3=CC=C(C)C=C3)(F)F                         | Train | 40   | 47.8 |
| Ea6f | Chalc<br>Salts | ClC1=CC=CC=C1C2=CC3=CC=CC=C3[S+]2C(F)(F)F                          | Train | 39.4 | 43.5 |
| Ea6g | Chalc<br>Salts | BrC1=CC(C2=CC3=CC=CC=C3[S+]2C(F)(F)F)=CC=C1                        | Train | 38.7 | 42.1 |
| Ea6h | Chalc<br>Salts | BrC(C=C1)=CC=C1C2=CC3=CC=CC=C3[S+]2C(F)(F)F                        | Train | 38.8 | 42.1 |
| Ea6i | Chalc<br>Salts | IC(C=C1)=CC=C1C2=CC3=CC=CC=C3[S+]2C(F)(F)F                         | Train | 39.1 | 40.5 |

|      |                |                                                           |       |      |      |
|------|----------------|-----------------------------------------------------------|-------|------|------|
| Ea7a | Chalc<br>Salts | FC([S+]1C2=CC=CC=C2OC3=C1C=CC=C3)(F)F                     | Train | 49.8 | 44.8 |
| Ea8a | Chalc<br>Salts | FC([S+]1C2=CC=CC=C2C3=C1C=C(S(=O)([O-])=O)C=C3)(F)F       | Train | 43.2 | 44.0 |
| Ea8b | Chalc<br>Salts | FC([S+]1C2=CC=C(C)C=C2C3=C1C=C(S(=O)([O-])=O)C(C)=C3)(F)F | Train | 45.9 | 45.4 |
| Ea9a | Chalc<br>Salts | O=C([C-](C(OC)=O)[S+](C(F)(F)F)C1=CC=CC=C1)OC             | Train | 72.4 | 74.6 |
| Eb1b | Sulf.<br>Salts | O=S(C1=CC=CC=C1)(C(F)(F)F)=NC(C2=CC=CC=C2)=O              | Train | 73.1 | 73.7 |
| Eb1c | Sulf.<br>Salts | O=S(C1=CC=CC=C1)(C(F)(F)F)=NC(C(F)(F)F)=O                 | Train | 65   | 67.2 |
| Eb1d | Sulf.<br>Salts | O=S(C1=CC=CC=C1)(C(F)(F)F)=NS(C2=CC=CC=C2)(=O)=O          | Train | 67.9 | 68.3 |
| Eb1e | Sulf.<br>Salts | O=S(C1=CC=CC=C1)(C(F)(F)F)=NS(=O)(C(F)(F)F)=O             | Train | 58.8 | 63.2 |
| Eb2a | Sulf.<br>Salts | [H]C1=C([H])C=C(S(=NC2=O)(C(F)(F)F)=O)C2=C1               | Train | 65.7 | 65.5 |
| Eb2b | Sulf.<br>Salts | [H]C1=C([N+](O)=O)C=C2C(S(=NC2=O)(C(F)(F)F)=O)C=C1        | Train | 60.3 | 61.2 |
| Eb2c | Sulf.<br>Salts | [H]C1=C([N+](O)=O)C=C(S(=NC2=O)(C(F)(F)F)=O)C2=C1         | Train | 60.4 | 61.2 |
| Eb3a | Sulf.<br>Salts | [H]C1=C([H])C=C(S(=NS2(=O)=O)(C(F)(F)F)=O)C2=C1           | Train | 60.7 | 60.7 |
| Eb4a | Sulf.<br>Salts | O=S(C1=CC=CC=C1)(C(F)(F)F)=[N+](C)C                       | Train | 45.3 | 42.1 |
| Ec1b | HIR            | O=C1C2=C(I(C(F)(F)F)O1)C=CC(OC)=C2                        | Train | 54.6 | 61.2 |
| Ec1c | HIR            | O=C1C2=C(I(C(F)(F)F)O1)C=CC(C)=C2                         | Train | 54.3 | 59.2 |
| Ec1d | HIR            | FC1=CC2=C(I(C(F)(F)F)OC2=O)C=C1                           | Train | 52.5 | 52.4 |
| Ec1e | HIR            | C1C1=CC2=C(I(C(F)(F)F)OC2=O)C=C1                          | Train | 52   | 52.3 |
| Ec1f | HIR            | BrC1=CC2=C(I(C(F)(F)F)OC2=O)C=C1                          | Train | 52   | 52.3 |
| Ec1g | HIR            | O=C1C2=C(I(C(F)(F)F)O1)C=CC(C(F)(F)F)=C2                  | Train | 51.6 | 52.9 |
| Ec1h | HIR            | O=C1C2=C(I(C(F)(F)F)O1)C=CC(C#N)=C2                       | Train | 50.8 | 52.4 |
| Ec2b | HIR            | COC1=CC2=C(I(C(F)(F)F)OC2(C)C)C=C1                        | Train | 79.9 | 84.0 |
| Ec2d | HIR            | FC1=CC2=C(I(C(F)(F)F)OC2(C)C)C=C1                         | Train | 78.3 | 80.2 |
| Ec2e | HIR            | C1C1=CC2=C(I(C(F)(F)F)OC2(C)C)C=C1                        | Train | 78.1 | 74.9 |
| Ec2f | HIR            | BrC1=CC2=C(I(C(F)(F)F)OC2(C)C)C=C1                        | Train | 77.9 | 78.3 |
| Ec2g | HIR            | FC(C1=CC2=C(I(C(F)(F)F)OC2(C)C)C=C1)(F)F                  | Train | 77.5 | 80.7 |
| Ec2i | HIR            | O=[N+](C1=CC2=C(I(C(F)(F)F)OC2(C)C)C=C1)[O-]              | Train | 76.4 | 80.4 |
| Ec3a | HIR            | [H]C1=CC2=C(I(C(F)(F)F)OC2(C(F)(F)F)C(F)(F)F)C=C1         | Train | 63.6 | 64.1 |
| Ec3b | HIR            | CC1=CC2=C(I(C(F)(F)F)OC2(C(F)(F)F)C(F)(F)F)C=C1           | Train | 64.4 | 69.4 |
| Ec3c | HIR            | FC(I1C2=C([C@ @])(C3=CC=CC=C3)(C)O1)C=CC=C2)(F)F          | Train | 74.7 | 78.0 |
| Ec3d | HIR            | FC(I1C2=C([C@ @])(CC)(C)O1)C=CC=C2)(F)F                   | Train | 80.7 | 83.5 |
| Ec3e | HIR            | FC(I1C2=C([C@ @])(C(C)C)(C)O1)C=CC=C2)(F)F                | Train | 81   | 86.0 |
| Ec3f | HIR            | FC(I1C2=C([C@ @])(C3CCCCC3)(C)O1)C=CC=C2)(F)F             | Train | 81.4 | 87.5 |
| Ec4a | HIR            | [H]C1=C2C(C34CCCC2C3)=C(I(OC4(C)C)C(F)(F)F)C=C1           | Train | 81   | 84.6 |
| Ea1a | Chalc<br>Salts | [H]C1=CC=C([S+](C(F)(F)F)C2=C3C=CC=C2)C3=C1               | Val   | 42.7 | 43.6 |
| Eb1a | Sulf.<br>Salts | O=S(C1=CC=CC=C1)(C(F)(F)F)=N                              | Val   | 89.4 | 83.5 |

|      |                |                                                                                  |      |      |      |
|------|----------------|----------------------------------------------------------------------------------|------|------|------|
| Ea5p | Chalc<br>Salts | <chem>FC([S+](C1=CC=C(OC(F)(F)F)C=C1)C2=CC=C(OC(F)(F)F)C=C2)(F)F</chem>          | Val  | 46.5 | 46.7 |
| Ea1f | Chalc<br>Salts | <chem>BrC1=CC=C([S+](C(F)(F)F)C2=C3C=CC=C2)C3=C1</chem>                          | Val  | 40.8 | 41.5 |
| Eb3c | Sulf.<br>Salts | <chem>[H]C1=C([N+](O)=O)C=C(S(=NS2(=O)=O)(C(F)(F)F)=O)C2=C1</chem>               | Val  | 55.5 | 57.1 |
| Ea5g | Chalc<br>Salts | <chem>FC([S+](C1=CC=CC=C1)C2=CC=C(C(F)(F)F)C=C2)(F)F</chem>                      | Val  | 46.7 | 47.7 |
| Ec2h | HIR            | <chem>N#CC1=CC2=C(I(C(F)(F)F)OC2(C)C)C=C1</chem>                                 | Val  | 76.8 | 77.5 |
| Ea6j | Chalc<br>Salts | <chem>FC(C=C1F)=CC=C1C2=CC3=CC=CC=C3[S+]2C(F)(F)F</chem>                         | Val  | 38.7 | 44.9 |
| Ea1n | Chalc<br>Salts | <chem>[H]C1=C(C)C=C2C([S+](C(F)(F)F)C3=C2C=C(C)C([H])=C3C)=C1C</chem>            | Val  | 46.2 | 48.3 |
| Ea1q | Chalc<br>Salts | <chem>[H]C1=C(C)C=C2C([S+](C(F)(F)F)C3=C2C=C([H])C(S(F)(F)(F)F)=C3[H])=C1</chem> | Val  | 39.6 | 46.1 |
| Ec1i | HIR            | <chem>O=C1C2=C(I(C(F)(F)F)O1)C=CC([N+](O)=O)=C2</chem>                           | Val  | 50.1 | 52.5 |
| Ea1m | Chalc<br>Salts | <chem>[H]C1=C(C)C([H])=C([S+](C(F)(F)F)C2=C3C=C([H])C(C)=C2[H])C3=C1</chem>      | Test | 43.9 | 47.4 |
| Ea5i | Chalc<br>Salts | <chem>FC([S+](C1=CC=CC=C1)C2=CC=C([N+](O)=O)C=C2)(F)F</chem>                     | Test | 44.1 | 41.1 |
| Ea5j | Chalc<br>Salts | <chem>FC([S+](C1=CC=CC=C1)C2=CC=CC([N+](O)=O)=C2)(F)F</chem>                     | Test | 45.3 | 41.1 |
| Ea6a | Chalc<br>Salts | <chem>FC([S+]1C2=CC=CC=C2C=C1C3CC3)(F)F</chem>                                   | Test | 41.9 | 45.7 |
| Ea6d | Chalc<br>Salts | <chem>FC([S+]1C2=CC=CC=C2C=C1C3=CC=C(OC)C=C3)(F)F</chem>                         | Test | 40.5 | 45.7 |
| Ea8c | Chalc<br>Salts | <chem>FC([S+]1C2=CC([N+](O)=O)=CC=C2C3=C1C=C(S(=O)(O)=O)C=C3)(F)F</chem>         | Test | 37.9 | 41.2 |
| Eb3b | Sulf.<br>Salts | <chem>[H]C1=C([N+](O)=O)C=C2C(S(=NS2(=O)=O)(C(F)(F)F)=O)=C1</chem>               | Test | 55.1 | 57.1 |
| Ec1a | HIR            | <chem>[H]C1=CC2=C(I(C(F)(F)F)OC2=O)C=C1</chem>                                   | Test | 53.9 | 52.6 |
| Ec2a | HIR            | <chem>[H]C1=CC2=C(I(C(F)(F)F)OC2(C)C)C=C1</chem>                                 | Test | 79.7 | 81.5 |
| Ec2c | HIR            | <chem>CC1=CC2=C(I(C(F)(F)F)OC2(C)C)C=C1</chem>                                   | Test | 79.8 | 84.4 |
| Ec3g | HIR            | <chem>[H]C1=CC2=C(I(C(F)(F)F)OC23CCCCC3)C=C1</chem>                              | Test | 81.8 | 84.6 |



## Feature Selection and Dimensionality Reduction

In machine learning applied to chemical data, feature reduction is an essential step for improving model performance, generalization, and interpretability. High-dimensional descriptor sets, such as those computed by Mordred, often contain redundant, irrelevant, or noisy features, which can lead to overfitting and decreased model transparency. To address this, we employed a combination of unsupervised statistical filtering and supervised feature importance analysis.

### 1. Variance Threshold Filtering

We first removed descriptors with zero or near-zero variance across the dataset. Features that do not vary across molecules do not carry meaningful discriminative information and can add unnecessary complexity to the model. Eliminating such descriptors reduces dimensionality and computational burden without affecting the predictive signal.

### 2. Correlation-Based Filtering

To minimize multicollinearity, we applied pairwise Pearson correlation analysis to the remaining descriptors. For descriptor pairs with a correlation coefficient  $|r| > 0.8$ , one descriptor was removed based on redundancy across chemical categories. This process ensures that each retained feature contributes uniquely to the model's decision-making and prevents overlapping signals from diluting feature importance metrics.

### 3. Extra Trees-Based Feature Importance

Beyond unsupervised filtering, we applied a supervised feature selection strategy using the Extra Trees (ET) algorithm. The ET model, an ensemble of randomized decision trees, provides a built-in feature importance score based on each descriptor's contribution to reducing prediction error (impurity) across decision paths. After training on the full descriptor set, the ET model identified the most influential features for predicting  $TC^{+}DA$  values. This method considers not only the statistical variation of features but also their relevance to the target property, capturing nonlinear relationships that may be missed by correlation-based filters alone.

### 4. Layered approach

In order to identify the optimal number of descriptors to use in training the model, a layered approach was employed. In this approach the features were added sequentially to the dataset, and

performance metrics were tracked for the models. With these five descriptors, the NN model reached peak performance, achieving cross-validation, training, and test  $R^2$  scores of 0.847, 0.962, and 0.943, respectively. However, the subsequent addition of other descriptor resulted in a dip in the cross-validation  $R^2$  score, with only slight increments observed in the training and test scores. Further incorporation of additional descriptors, whether 7, 8, or even 20 in total, led to pronounced overfitting, evidenced by training  $R^2$  scores nearing 1 while significant gaps emerged between training and test performances. Therefore, five descriptors were identified as the optimal feature set, enabling the NN model to achieve high predictive accuracy while keeping the model architecture simple and free from unnecessary complexity.

From this analysis, a subset of five interpretable and chemically meaningful descriptors was selected. These included features related to electrostatic potential, bond energies, atomic environments, and molecular shape, all of which correlate with known mechanistic influences on trifluoromethylation reactivity. By combining statistical and model-driven selection methods, we ensured that the final descriptor set retained the most relevant features for both predictive performance and chemical insight.

### **Perspective on Feature Reduction**

Feature selection not only enhances model efficiency and accuracy but also serves as a tool for uncovering mechanistic patterns in chemical data. However, it must be applied with caution. Overzealous reduction can discard descriptors that, while correlated, may provide complementary mechanistic information. Similarly, reliance on a single feature selection criterion can introduce bias if the underlying relationships are nonlinear or context-specific.

In our approach, combining filtering techniques with supervised importance scoring allowed us to mitigate these risks. The retained features were interpretable and aligned with known reactivity trends, thus reinforcing confidence in the model and offering practical guidance for future reagent design.

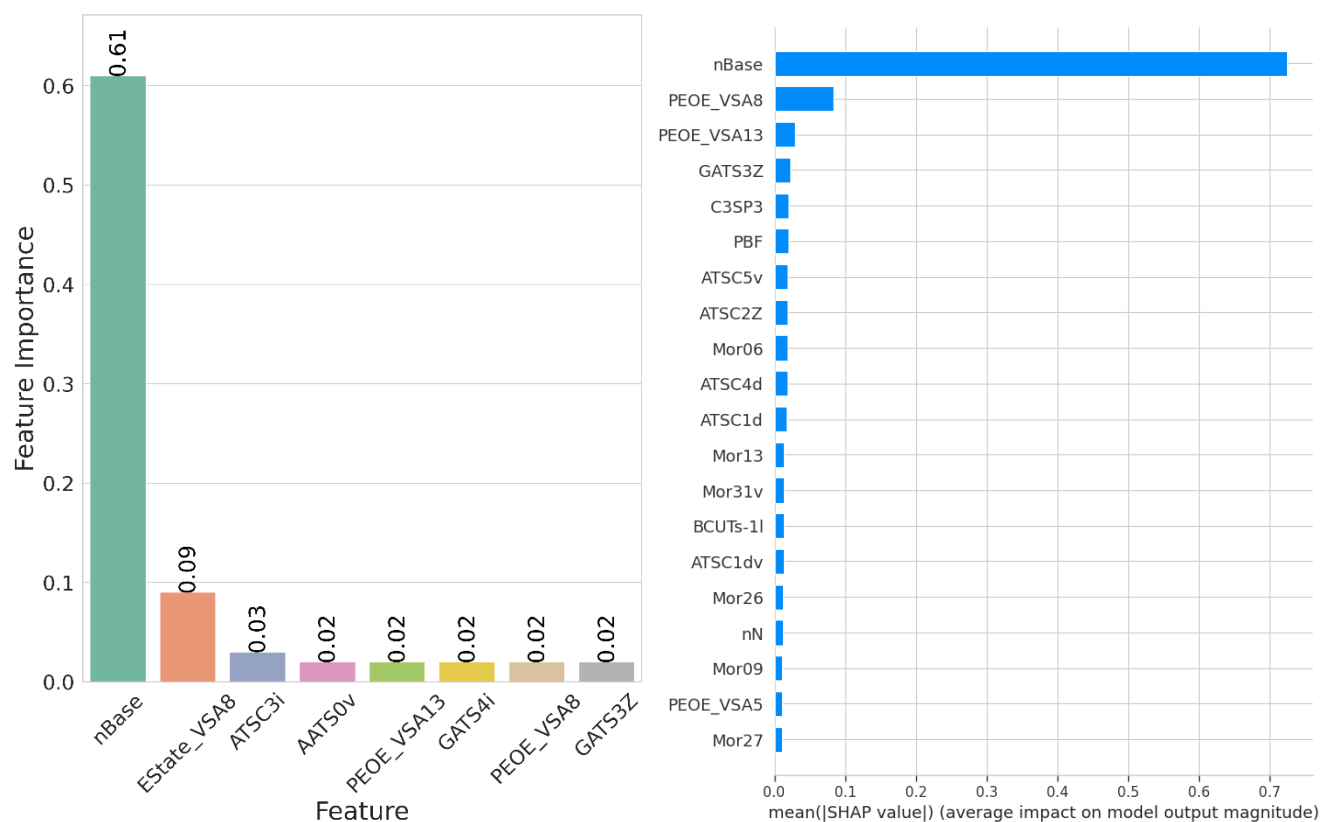

Figure S1 Comparison of different feature importance algorithm. A) Extra tree based feature importance chart. B) Feature importance based on SHAP values.
